# Supplementary material for: Changes in Health Care Access during the COVID-19 Pandemic: Estimates of National Japanese Data, June 2020–October 2021
Source: MDPI journal article supplement (doi:10.3390/ijerph19148810), 2022-07-20
Supplement: s1 [file s1]

## Online Supplementary Material.

### Table of Contents

| <b>Table/Figure</b> | <b>Title</b>                                                                                 | <b>Page</b> |
|---------------------|----------------------------------------------------------------------------------------------|-------------|
| Table S1            | Monthly average number of outpatients per day at hospitals in Japan, June 2020-October 2021. | 2-3         |
| Table S2            | Monthly average number of inpatients per day in Japan, June 2020-October 2021.               | 4-5         |
| Table S3            | Monthly average length of hospital stay per patient in Japan, June 2020-October 2021.        | 6-7         |
| Table S4            | Monthly number of new hospitalizations in Japan, June 2020-October 2021.                     | 8-10        |

**Table S1. Monthly average number of outpatients per day at hospitals in Japan, January 2020-October 2021.**

| Hospital Type        | Month-Year | Observed | Excess | % Excess  | Exiguous      | % Exiguous |
|----------------------|------------|----------|--------|-----------|---------------|------------|
| General hospital     |            |          |        |           |               |            |
|                      | Jun-20     | 1145535  | 0-0    | 0.00-0.00 | 25704-110786  | 2.05-8.82  |
|                      | Jul-20     | 1160820  | 0-0    | 0.00-0.00 | 31360-108344  | 2.47-8.54  |
|                      | Aug-20     | 1101002  | 0-0    | 0.00-0.00 | 73470-149900  | 5.87-11.98 |
|                      | Sep-20     | 1172387  | 0-0    | 0.00-0.00 | 9202-88527    | 0.73-7.02  |
|                      | Oct-20     | 1245515  | 0-0    | 0.00-0.00 | 0-20475       | 0.00-1.62  |
|                      | Nov-20     | 1165447  | 0-0    | 0.00-0.00 | 29549-107275  | 2.32-8.43  |
|                      | Dec-20     | 1173032  | 0-0    | 0.00-0.00 | 0-76114       | 0.00-6.09  |
|                      | Jan-21     | 1045311  | 0-0    | 0.00-0.00 | 114863-191226 | 9.29-15.46 |
|                      | Feb-21     | 1123639  | 0-0    | 0.00-0.00 | 43561-122183  | 3.50-9.81  |
|                      | Mar-21     | 1234309  | 0-0    | 0.00-0.00 | 0-26042       | 0.00-2.07  |
|                      | Apr-21     | 1197703  | 0-0    | 0.00-0.00 | 0-36056       | 0.00-2.92  |
|                      | May-21     | 1062361  | 0-0    | 0.00-0.00 | 105198-176846 | 8.49-14.27 |
|                      | Jun-21     | 1238764  | 0-0    | 0.00-0.00 | 0-12238       | 0.00-0.98  |
|                      | Jul-21     | 1190787  | 0-0    | 0.00-0.00 | 1597-70266    | 0.13-5.57  |
|                      | Aug-21     | 1197168  | 0-0    | 0.00-0.00 | 0-47924       | 0.00-3.85  |
|                      | Sep-21     | 1223731  | 0-0    | 0.00-0.00 | 0-26840       | 0.00-2.15  |
|                      | Oct-21     | 1217300  | 0-0    | 0.00-0.00 | 0-41034       | 0.00-3.26  |
| Psychiatric hospital |            |          |        |           |               |            |
|                      | Jun-20     | 56883    | 0-0    | 0.00-0.00 | 0-2329        | 0.00-3.93  |
|                      | Jul-20     | 56814    | 0-0    | 0.00-0.00 | 0-2869        | 0.00-4.81  |
|                      | Aug-20     | 53453    | 0-0    | 0.00-0.00 | 1725-5650     | 2.92-9.56  |
|                      | Sep-20     | 56689    | 0-0    | 0.00-0.00 | 0-2849        | 0.00-4.78  |
|                      | Oct-20     | 59519    | 0-0    | 0.00-0.00 | 0-22          | 0.00-0.04  |
|                      | Nov-20     | 55226    | 0-0    | 0.00-0.00 | 247-4221      | 0.42-7.10  |
|                      | Dec-20     | 56776    | 0-0    | 0.00-0.00 | 0-1229        | 0.00-2.12  |
|                      | Jan-21     | 50781    | 0-0    | 0.00-0.00 | 3019-6628     | 5.26-11.55 |
|                      | Feb-21     | 55416    | 0-0    | 0.00-0.00 | 0-2680        | 0.00-4.61  |
|                      | Mar-21     | 59728    | 0-0    | 0.00-0.00 | 0-339         | 0.00-0.56  |
|                      | Apr-21     | 59122    | 171-0  | 0.29-0.00 | 0-0           | 0.00-0.00  |
|                      | May-21     | 51584    | 0-0    | 0.00-0.00 | 3730-7506     | 6.31-12.70 |
|                      | Jun-21     | 58698    | 0-0    | 0.00-0.00 | 0-624         | 0.00-1.05  |
|                      | Jul-21     | 57202    | 0-0    | 0.00-0.00 | 0-2338        | 0.00-3.93  |
|                      | Aug-21     | 55546    | 0-0    | 0.00-0.00 | 0-3374        | 0.00-5.73  |
|                      | Sep-21     | 58021    | 0-0    | 0.00-0.00 | 0-1183        | 0.00-2.00  |
|                      | Oct-21     | 58075    | 0-0    | 0.00-0.00 | 0-1224        | 0.00-2.06  |
| Total                |            |          |        |           |               |            |
|                      | Jun-20     | 1202418  | 0-0    | 0.00-0.00 | 24355-113081  | 1.85-8.60  |
|                      | Jul-20     | 1217634  | 0-0    | 0.00-0.00 | 30758-111182  | 2.31-8.37  |
|                      | Aug-20     | 1154455  | 0-0    | 0.00-0.00 | 75372-155512  | 5.75-11.87 |
|                      | Sep-20     | 1229076  | 0-0    | 0.00-0.00 | 8562-91338    | 0.65-6.92  |
|                      | Oct-20     | 1305034  | 0-0    | 0.00-0.00 | 0-20468       | 0.00-1.54  |
|                      | Nov-20     | 1220673  | 0-0    | 0.00-0.00 | 29994-111482  | 2.25-8.37  |

|  |        |         |     |           |               |            |
|--|--------|---------|-----|-----------|---------------|------------|
|  | Dec-20 | 1229808 | 0-0 | 0.00-0.00 | 0-77342       | 0.00-5.92  |
|  | Jan-21 | 1096091 | 0-0 | 0.00-0.00 | 118082-197856 | 9.13-15.29 |
|  | Feb-21 | 1179055 | 0-0 | 0.00-0.00 | 42451-124858  | 3.26-9.58  |
|  | Mar-21 | 1294037 | 0-0 | 0.00-0.00 | 0-26330       | 0.00-1.99  |
|  | Apr-21 | 1256825 | 0-0 | 0.00-0.00 | 0-35833       | 0.00-2.77  |
|  | May-21 | 1113945 | 0-0 | 0.00-0.00 | 109115-184306 | 8.40-14.20 |
|  | Jun-21 | 1297463 | 0-0 | 0.00-0.00 | 0-12823       | 0.00-0.98  |
|  | Jul-21 | 1247989 | 0-0 | 0.00-0.00 | 729-72575     | 0.06-5.50  |
|  | Aug-21 | 1252714 | 0-0 | 0.00-0.00 | 0-51266       | 0.00-3.93  |
|  | Sep-21 | 1281753 | 0-0 | 0.00-0.00 | 0-27988       | 0.00-2.14  |
|  | Oct-21 | 1275375 | 0-0 | 0.00-0.00 | 0-42235       | 0.00-3.21  |

**Table S2. Monthly average number of inpatients per day in Japan, January 2020-October 2021.**

| Bed Type                                                       | Month-Year | Observed | Excess | % Excess  | Exiguous    | % Exiguous  |
|----------------------------------------------------------------|------------|----------|--------|-----------|-------------|-------------|
| General beds                                                   |            |          |        |           |             |             |
|                                                                | Jun-20     | 606442   | 0-0    | 0.00-0.00 | 53019-69453 | 7.84-10.28  |
|                                                                | Jul-20     | 624200   | 0-0    | 0.00-0.00 | 35418-56275 | 5.20-8.27   |
|                                                                | Aug-20     | 627843   | 0-0    | 0.00-0.00 | 37967-52433 | 5.58-7.71   |
|                                                                | Sep-20     | 629621   | 0-0    | 0.00-0.00 | 31584-48255 | 4.66-7.12   |
|                                                                | Oct-20     | 636628   | 0-0    | 0.00-0.00 | 19795-41271 | 2.92-6.09   |
|                                                                | Nov-20     | 638290   | 0-0    | 0.00-0.00 | 27348-41984 | 4.02-6.17   |
|                                                                | Dec-20     | 625235   | 0-0    | 0.00-0.00 | 42143-59228 | 6.16-8.65   |
|                                                                | Jan-21     | 626119   | 0-0    | 0.00-0.00 | 43607-65879 | 6.30-9.52   |
|                                                                | Feb-21     | 636429   | 0-0    | 0.00-0.00 | 51159-66486 | 7.28-9.46   |
|                                                                | Mar-21     | 633087   | 0-0    | 0.00-0.00 | 47933-65643 | 6.86-9.39   |
|                                                                | Apr-21     | 625590   | 0-0    | 0.00-0.00 | 37590-58863 | 5.49-8.60   |
|                                                                | May-21     | 603064   | 0-0    | 0.00-0.00 | 61494-75780 | 9.06-11.16  |
|                                                                | Jun-21     | 608020   | 0-0    | 0.00-0.00 | 52565-68997 | 7.76-10.19  |
|                                                                | Jul-21     | 613338   | 0-0    | 0.00-0.00 | 47379-67790 | 6.96-9.95   |
|                                                                | Aug-21     | 617473   | 0-0    | 0.00-0.00 | 50032-64129 | 7.34-9.41   |
|                                                                | Sep-21     | 604369   | 0-0    | 0.00-0.00 | 56899-73325 | 8.40-10.82  |
|                                                                | Oct-21     | 611561   | 0-0    | 0.00-0.00 | 44104-65161 | 6.52-9.63   |
| Long-term care beds covered by long-term care insurance (LTCI) |            |          |        |           |             |             |
|                                                                | Jun-20     | 15398    | 0-0    | 0.00-0.00 | 9583-13087  | 33.64-45.94 |
|                                                                | Jul-20     | 15075    | 0-0    | 0.00-0.00 | 9175-12730  | 33.00-45.78 |
|                                                                | Aug-20     | 14955    | 0-0    | 0.00-0.00 | 8962-12416  | 32.74-45.36 |
|                                                                | Sep-20     | 14398    | 0-0    | 0.00-0.00 | 9001-12383  | 33.61-46.24 |
|                                                                | Oct-20     | 13841    | 0-0    | 0.00-0.00 | 9035-12327  | 34.53-47.11 |
|                                                                | Nov-20     | 13624    | 0-0    | 0.00-0.00 | 8799-11974  | 34.37-46.78 |
|                                                                | Dec-20     | 13445    | 0-0    | 0.00-0.00 | 8602-11724  | 34.18-46.58 |
|                                                                | Jan-21     | 13165    | 0-0    | 0.00-0.00 | 8613-11680  | 34.67-47.01 |
|                                                                | Feb-21     | 13060    | 0-0    | 0.00-0.00 | 8520-11506  | 34.68-46.84 |
|                                                                | Mar-21     | 12906    | 0-0    | 0.00-0.00 | 8141-11015  | 34.03-46.05 |
|                                                                | Apr-21     | 12460    | 0-0    | 0.00-0.00 | 8090-10836  | 34.73-46.51 |
|                                                                | May-21     | 12144    | 0-0    | 0.00-0.00 | 7995-10580  | 35.18-46.56 |
|                                                                | Jun-21     | 11674    | 0-0    | 0.00-0.00 | 8057-10598  | 36.18-47.58 |
|                                                                | Jul-21     | 11148    | 0-0    | 0.00-0.00 | 8195-10658  | 37.58-48.88 |
|                                                                | Aug-21     | 10711    | 0-0    | 0.00-0.00 | 8317-10675  | 38.89-49.92 |
|                                                                | Sep-21     | 10466    | 0-0    | 0.00-0.00 | 8016-10325  | 38.56-49.66 |
|                                                                | Oct-21     | 8903     | 0-0    | 0.00-0.00 | 9053-11292  | 44.83-55.91 |
| Tuberculosis care beds                                         |            |          |        |           |             |             |
|                                                                | Jun-20     | 1279     | 0-0    | 0.00-0.00 | 49-128      | 3.48-9.07   |
|                                                                | Jul-20     | 1404     | 0-0    | 0.00-0.00 | 0-10        | 0.00-0.69   |
|                                                                | Aug-20     | 1424     | 11-0   | 0.80-0.00 | 0-0         | 0.00-0.00   |
|                                                                | Sep-20     | 1337     | 0-0    | 0.00-0.00 | 0-68        | 0.00-4.84   |
|                                                                | Oct-20     | 1330     | 0-0    | 0.00-0.00 | 0-58        | 0.00-4.18   |
|                                                                | Nov-20     | 1306     | 0-0    | 0.00-0.00 | 0-51        | 0.00-3.78   |
|                                                                | Dec-20     | 1284     | 0-0    | 0.00-0.00 | 0-39        | 0.00-2.92   |
|                                                                | Jan-21     | 1203     | 0-0    | 0.00-0.00 | 9-82        | 0.70-6.35   |
|                                                                | Feb-21     | 1117     | 0-0    | 0.00-0.00 | 71-140      | 5.65-11.15  |
|                                                                | Mar-21     | 1124     | 0-0    | 0.00-0.00 | 59-133      | 4.69-10.60  |
|                                                                | Apr-21     | 1156     | 0-0    | 0.00-0.00 | 34-103      | 2.70-8.18   |
|                                                                | May-21     | 1178     | 0-0    | 0.00-0.00 | 18-87       | 1.42-6.88   |
|                                                                | Jun-21     | 1117     | 0-0    | 0.00-0.00 | 87-161      | 6.81-12.58  |
|                                                                | Jul-21     | 1136     | 0-0    | 0.00-0.00 | 81-151      | 6.30-11.71  |
|                                                                | Aug-21     | 1204     | 0-0    | 0.00-0.00 | 10-80       | 0.78-6.25   |
|                                                                | Sep-21     | 1194     | 0-0    | 0.00-0.00 | 7-82        | 0.55-6.44   |
|                                                                | Oct-21     | 1140     | 0-0    | 0.00-0.00 | 45-113      | 3.59-9.05   |

|                       |        |         |     |           |             |           |
|-----------------------|--------|---------|-----|-----------|-------------|-----------|
| Psychiatric care beds | Jun-20 | 275436  | 0-0 | 0.00-0.00 | 2871-4412   | 1.03-1.58 |
|                       | Jul-20 | 277282  | 0-0 | 0.00-0.00 | 1632-3240   | 0.58-1.15 |
|                       | Aug-20 | 277321  | 0-0 | 0.00-0.00 | 2123-3444   | 0.76-1.23 |
|                       | Sep-20 | 276805  | 0-0 | 0.00-0.00 | 1769-3333   | 0.63-1.19 |
|                       | Oct-20 | 275617  | 0-0 | 0.00-0.00 | 1689-3326   | 0.61-1.19 |
|                       | Nov-20 | 274223  | 0-0 | 0.00-0.00 | 2179-3523   | 0.78-1.27 |
|                       | Dec-20 | 272587  | 0-0 | 0.00-0.00 | 2972-4470   | 1.07-1.61 |
|                       | Jan-21 | 271247  | 0-0 | 0.00-0.00 | 4104-5678   | 1.48-2.05 |
|                       | Feb-21 | 271358  | 0-0 | 0.00-0.00 | 4456-5802   | 1.61-2.09 |
|                       | Mar-21 | 270929  | 0-0 | 0.00-0.00 | 4473-6006   | 1.62-2.17 |
|                       | Apr-21 | 270615  | 0-0 | 0.00-0.00 | 4236-5831   | 1.53-2.11 |
|                       | May-21 | 269794  | 0-0 | 0.00-0.00 | 5431-6787   | 1.96-2.45 |
|                       | Jun-21 | 271014  | 0-0 | 0.00-0.00 | 4504-6074   | 1.63-2.19 |
|                       | Jul-21 | 272190  | 0-0 | 0.00-0.00 | 3929-5572   | 1.41-2.01 |
|                       | Aug-21 | 271615  | 0-0 | 0.00-0.00 | 5024-6379   | 1.81-2.29 |
|                       | Sep-21 | 270607  | 0-0 | 0.00-0.00 | 5176-6708   | 1.87-2.42 |
|                       | Oct-21 | 269994  | 0-0 | 0.00-0.00 | 4482-6091   | 1.62-2.21 |
| Total                 | Jun-20 | 1132251 | 0-0 | 0.00-0.00 | 74068-93461 | 6.04-7.63 |
|                       | Jul-20 | 1152518 | 0-0 | 0.00-0.00 | 53550-77704 | 4.35-6.32 |
|                       | Aug-20 | 1157587 | 0-0 | 0.00-0.00 | 54787-72038 | 4.46-5.86 |
|                       | Sep-20 | 1159073 | 0-0 | 0.00-0.00 | 46199-66017 | 3.77-5.39 |
|                       | Oct-20 | 1162959 | 0-0 | 0.00-0.00 | 34461-59230 | 2.82-4.85 |
|                       | Nov-20 | 1164670 | 0-0 | 0.00-0.00 | 40602-57911 | 3.32-4.74 |
|                       | Dec-20 | 1152660 | 0-0 | 0.00-0.00 | 53108-73186 | 4.33-5.97 |
|                       | Jan-21 | 1155071 | 0-0 | 0.00-0.00 | 52788-78261 | 4.28-6.35 |
|                       | Feb-21 | 1164661 | 0-0 | 0.00-0.00 | 62672-80590 | 5.03-6.47 |
|                       | Mar-21 | 1157974 | 0-0 | 0.00-0.00 | 61785-82260 | 4.98-6.63 |
|                       | Apr-21 | 1151297 | 0-0 | 0.00-0.00 | 48544-72874 | 3.97-5.95 |
|                       | May-21 | 1128836 | 0-0 | 0.00-0.00 | 71665-88342 | 5.89-7.26 |
|                       | Jun-21 | 1131535 | 0-0 | 0.00-0.00 | 63471-82823 | 5.23-6.82 |
|                       | Jul-21 | 1136629 | 0-0 | 0.00-0.00 | 58628-81808 | 4.81-6.71 |
|                       | Aug-21 | 1148034 | 0-0 | 0.00-0.00 | 54170-70262 | 4.45-5.77 |
|                       | Sep-21 | 1130001 | 0-0 | 0.00-0.00 | 62945-81818 | 5.19-6.75 |
|                       | Oct-21 | 1126324 | 0-0 | 0.00-0.00 | 57800-81274 | 4.79-6.73 |
| Long-term care beds   | Jun-20 | 248918  | 0-0 | 0.00-0.00 | 14258-19864 | 5.30-7.39 |
|                       | Jul-20 | 249018  | 0-0 | 0.00-0.00 | 13180-19120 | 4.92-7.13 |
|                       | Aug-20 | 248646  | 0-0 | 0.00-0.00 | 13310-18847 | 4.98-7.05 |
|                       | Sep-20 | 249234  | 0-0 | 0.00-0.00 | 11201-16743 | 4.21-6.29 |
|                       | Oct-20 | 247453  | 0-0 | 0.00-0.00 | 11175-16930 | 4.23-6.40 |
|                       | Nov-20 | 247205  | 0-0 | 0.00-0.00 | 11184-16509 | 4.24-6.26 |
|                       | Dec-20 | 247257  | 0-0 | 0.00-0.00 | 11039-16355 | 4.19-6.20 |
|                       | Jan-21 | 247389  | 0-0 | 0.00-0.00 | 11569-17177 | 4.37-6.49 |
|                       | Feb-21 | 249197  | 0-0 | 0.00-0.00 | 11153-16345 | 4.20-6.16 |
|                       | Mar-21 | 248496  | 0-0 | 0.00-0.00 | 11155-16268 | 4.21-6.14 |
|                       | Apr-21 | 247160  | 0-0 | 0.00-0.00 | 10126-15416 | 3.86-5.87 |
|                       | May-21 | 244330  | 0-0 | 0.00-0.00 | 11899-16691 | 4.56-6.39 |
|                       | Jun-21 | 245106  | 0-0 | 0.00-0.00 | 9588-14384  | 3.69-5.54 |
|                       | Jul-21 | 244510  | 0-0 | 0.00-0.00 | 9390-14343  | 3.63-5.54 |
|                       | Aug-21 | 244251  | 0-0 | 0.00-0.00 | 9378-13848  | 3.63-5.37 |
|                       | Sep-21 | 243861  | 0-0 | 0.00-0.00 | 7892-12317  | 3.08-4.81 |
|                       | Oct-21 | 241535  | 0-0 | 0.00-0.00 | 8100-12700  | 3.19-5.00 |

**Table S3. Monthly average length of hospital stay per patient in Japan, January 2020-October 2021.**

| Bed Type                                                       | Month-Year | Observed | Excess | % Excess    | Exiguous | % Exiguous  |
|----------------------------------------------------------------|------------|----------|--------|-------------|----------|-------------|
| General beds                                                   |            |          |        |             |          |             |
|                                                                | Jun-20     | 16       | 0-0    | 0.61-0.00   | 0-0      | 0.00-0.00   |
|                                                                | Jul-20     | 16       | 0-0    | 1.16-0.00   | 0-0      | 0.00-0.00   |
|                                                                | Aug-20     | 16       | 0-0    | 1.10-0.00   | 0-0      | 0.00-0.00   |
|                                                                | Sep-20     | 16       | 0-0    | 0.84-0.00   | 0-0      | 0.00-0.00   |
|                                                                | Oct-20     | 16       | 0-0    | 0.76-0.00   | 0-0      | 0.00-0.00   |
|                                                                | Nov-20     | 16       | 0-0    | 0.68-0.00   | 0-0      | 0.00-0.00   |
|                                                                | Dec-20     | 16       | 0-0    | 0.00-0.00   | 0-0      | 0.00-0.71   |
|                                                                | Jan-21     | 18       | 2-0    | 10.99-0.00  | 0-0      | 0.00-0.00   |
|                                                                | Feb-21     | 17       | 1-0    | 4.59-0.00   | 0-0      | 0.00-0.00   |
|                                                                | Mar-21     | 16       | 0-0    | 0.84-0.00   | 0-0      | 0.00-0.00   |
|                                                                | Apr-21     | 16       | 0-0    | 0.92-0.00   | 0-0      | 0.00-0.00   |
|                                                                | May-21     | 17       | 1-0    | 7.14-0.00   | 0-0      | 0.00-0.00   |
|                                                                | Jun-21     | 16       | 0-0    | 1.85-0.00   | 0-0      | 0.00-0.00   |
|                                                                | Jul-21     | 16       | 0-0    | 1.58-0.00   | 0-0      | 0.00-0.00   |
|                                                                | Aug-21     | 16       | 0-0    | 1.39-0.00   | 0-0      | 0.00-0.00   |
|                                                                | Sep-21     | 16       | 0-0    | 1.10-0.00   | 0-0      | 0.00-0.00   |
|                                                                | Oct-21     | 16       | 0-0    | 1.01-0.00   | 0-0      | 0.00-0.00   |
| Long-term care beds covered by long-term care insurance (LTCI) |            |          |        |             |          |             |
|                                                                | Jun-20     | 305      | 0-0    | 0.00-0.00   | 0-8      | 0.00-2.53   |
|                                                                | Jul-20     | 335      | 20-0   | 6.38-0.00   | 0-0      | 0.00-0.00   |
|                                                                | Aug-20     | 319      | 2-0    | 0.71-0.00   | 0-0      | 0.00-0.00   |
|                                                                | Sep-20     | 315      | 4-0    | 1.22-0.00   | 0-0      | 0.00-0.00   |
|                                                                | Oct-20     | 346      | 39-4   | 12.78-1.30  | 0-0      | 0.00-0.00   |
|                                                                | Nov-20     | 341      | 37-2   | 12.29-0.66  | 0-0      | 0.00-0.00   |
|                                                                | Dec-20     | 347      | 40-4   | 12.97-1.30  | 0-0      | 0.00-0.00   |
|                                                                | Jan-21     | 355      | 48-13  | 15.79-4.24  | 0-0      | 0.00-0.00   |
|                                                                | Feb-21     | 357      | 57-21  | 18.81-6.99  | 0-0      | 0.00-0.00   |
|                                                                | Mar-21     | 330      | 42-8   | 14.69-2.78  | 0-0      | 0.00-0.00   |
|                                                                | Apr-21     | 334      | 35-0   | 11.77-0.00  | 0-0      | 0.00-0.00   |
|                                                                | May-21     | 385      | 76-40  | 24.72-12.96 | 0-0      | 0.00-0.00   |
|                                                                | Jun-21     | 312      | 0-0    | 0.00-0.00   | 0-8      | 0.00-2.38   |
|                                                                | Jul-21     | 334      | 12-0   | 3.85-0.00   | 0-0      | 0.00-0.00   |
|                                                                | Aug-21     | 351      | 30-0   | 9.26-0.00   | 0-0      | 0.00-0.00   |
|                                                                | Sep-21     | 264      | 0-0    | 0.00-0.00   | 21-55    | 6.58-17.22  |
|                                                                | Oct-21     | 288      | 0-0    | 0.00-0.00   | 0-26     | 0.00-8.20   |
| Tuberculosis care beds                                         |            |          |        |             |          |             |
|                                                                | Jun-20     | 50       | 0-0    | 0.00-0.00   | 0-15     | 0.00-23.06  |
|                                                                | Jul-20     | 42       | 0-0    | 0.00-0.00   | 7-22     | 10.93-34.44 |
|                                                                | Aug-20     | 48       | 0-0    | 0.00-0.00   | 2-18     | 3.05-26.80  |
|                                                                | Sep-20     | 57       | 0-0    | 0.00-0.00   | 0-8      | 0.00-12.39  |
|                                                                | Oct-20     | 59       | 0-0    | 0.00-0.00   | 0-6      | 0.00-9.33   |
|                                                                | Nov-20     | 57       | 0-0    | 0.00-0.00   | 0-6      | 0.00-9.47   |
|                                                                | Dec-20     | 47       | 0-0    | 0.00-0.00   | 1-16     | 1.58-25.70  |
|                                                                | Jan-21     | 50       | 0-0    | 0.00-0.00   | 0-13     | 0.00-20.14  |
|                                                                | Feb-21     | 56       | 0-0    | 0.00-0.00   | 0-7      | 0.00-10.96  |
|                                                                | Mar-21     | 51       | 0-0    | 0.00-0.00   | 0-11     | 0.00-17.80  |
|                                                                | Apr-21     | 49       | 0-0    | 0.00-0.00   | 0-15     | 0.00-23.24  |
|                                                                | May-21     | 48       | 0-0    | 0.00-0.00   | 1-16     | 1.56-25.28  |
|                                                                | Jun-21     | 53       | 0-0    | 0.00-0.00   | 0-12     | 0.00-18.10  |
|                                                                | Jul-21     | 48       | 0-0    | 0.00-0.00   | 1-16     | 1.57-24.60  |
|                                                                | Aug-21     | 42       | 0-0    | 0.00-0.00   | 8-23     | 12.33-35.25 |
|                                                                | Sep-21     | 48       | 0-0    | 0.00-0.00   | 2-16     | 3.10-25.51  |
|                                                                | Oct-21     | 59       | 0-0    | 0.00-0.00   | 0-5      | 0.00-7.78   |

|                       |        |     |      |            |     |           |
|-----------------------|--------|-----|------|------------|-----|-----------|
| Psychiatric care beds |        |     |      |            |     |           |
|                       | Jun-20 | 265 | 10-0 | 3.87-0.00  | 0-0 | 0.00-0.00 |
|                       | Jul-20 | 270 | 15-0 | 5.82-0.00  | 0-0 | 0.00-0.00 |
|                       | Aug-20 | 279 | 20-0 | 7.53-0.00  | 0-0 | 0.00-0.00 |
|                       | Sep-20 | 268 | 8-0  | 3.14-0.00  | 0-0 | 0.00-0.00 |
|                       | Oct-20 | 258 | 0-0  | 0.00-0.00  | 0-4 | 0.00-1.49 |
|                       | Nov-20 | 279 | 17-0 | 6.46-0.00  | 0-0 | 0.00-0.00 |
|                       | Dec-20 | 271 | 3-0  | 1.01-0.00  | 0-0 | 0.00-0.00 |
|                       | Jan-21 | 308 | 38-5 | 14.21-1.85 | 0-0 | 0.00-0.00 |
|                       | Feb-21 | 281 | 14-0 | 5.38-0.00  | 0-0 | 0.00-0.00 |
|                       | Mar-21 | 259 | 0-0  | 0.19-0.00  | 0-0 | 0.00-0.00 |
|                       | Apr-21 | 264 | 6-0  | 2.18-0.00  | 0-0 | 0.00-0.00 |
|                       | May-21 | 298 | 41-9 | 16.09-3.51 | 0-0 | 0.00-0.00 |
|                       | Jun-21 | 265 | 11-0 | 4.22-0.00  | 0-0 | 0.00-0.00 |
|                       | Jul-21 | 273 | 18-0 | 6.88-0.00  | 0-0 | 0.00-0.00 |
|                       | Aug-21 | 278 | 19-0 | 7.32-0.00  | 0-0 | 0.00-0.00 |
|                       | Sep-21 | 272 | 12-0 | 4.58-0.00  | 0-0 | 0.00-0.00 |
|                       | Oct-21 | 273 | 12-0 | 4.56-0.00  | 0-0 | 0.00-0.00 |
| Total                 |        |     |      |            |     |           |
|                       | Jun-20 | 28  | 1-0  | 4.26-0.00  | 0-0 | 0.00-0.00 |
|                       | Jul-20 | 28  | 2-0  | 6.24-0.00  | 0-0 | 0.00-0.00 |
|                       | Aug-20 | 28  | 1-0  | 4.90-0.00  | 0-0 | 0.00-0.00 |
|                       | Sep-20 | 28  | 1-0  | 5.01-0.00  | 0-0 | 0.00-0.00 |
|                       | Oct-20 | 27  | 0-0  | 0.76-0.00  | 0-0 | 0.00-0.00 |
|                       | Nov-20 | 28  | 2-0  | 6.19-0.00  | 0-0 | 0.00-0.00 |
|                       | Dec-20 | 27  | 0-0  | 0.88-0.00  | 0-0 | 0.00-0.00 |
|                       | Jan-21 | 30  | 3-0  | 11.78-0.00 | 0-0 | 0.00-0.00 |
|                       | Feb-21 | 29  | 2-0  | 6.68-0.00  | 0-0 | 0.00-0.00 |
|                       | Mar-21 | 27  | 0-0  | 1.64-0.00  | 0-0 | 0.00-0.00 |
|                       | Apr-21 | 27  | 0-0  | 0.97-0.00  | 0-0 | 0.00-0.00 |
|                       | May-21 | 29  | 2-0  | 9.07-0.00  | 0-0 | 0.00-0.00 |
|                       | Jun-21 | 27  | 1-0  | 3.25-0.00  | 0-0 | 0.00-0.00 |
|                       | Jul-21 | 27  | 1-0  | 4.78-0.00  | 0-0 | 0.00-0.00 |
|                       | Aug-21 | 27  | 1-0  | 3.11-0.00  | 0-0 | 0.00-0.00 |
|                       | Sep-21 | 27  | 1-0  | 3.34-0.00  | 0-0 | 0.00-0.00 |
|                       | Oct-21 | 27  | 1-0  | 2.95-0.00  | 0-0 | 0.00-0.00 |
| Long-term care beds   |        |     |      |            |     |           |
|                       | Jun-20 | 135 | 2-0  | 1.25-0.00  | 0-0 | 0.00-0.00 |
|                       | Jul-20 | 140 | 7-0  | 5.62-0.00  | 0-0 | 0.00-0.00 |
|                       | Aug-20 | 140 | 6-0  | 4.81-0.00  | 0-0 | 0.00-0.00 |
|                       | Sep-20 | 135 | 3-0  | 2.36-0.00  | 0-0 | 0.00-0.00 |
|                       | Oct-20 | 131 | 1-0  | 0.41-0.00  | 0-0 | 0.00-0.00 |
|                       | Nov-20 | 134 | 7-0  | 5.52-0.00  | 0-0 | 0.00-0.00 |
|                       | Dec-20 | 124 | 0-0  | 0.00-0.00  | 0-3 | 0.00-2.68 |
|                       | Jan-21 | 141 | 15-0 | 11.69-0.00 | 0-0 | 0.00-0.00 |
|                       | Feb-21 | 131 | 5-0  | 3.80-0.00  | 0-0 | 0.00-0.00 |
|                       | Mar-21 | 126 | 3-0  | 2.11-0.00  | 0-0 | 0.00-0.00 |
|                       | Apr-21 | 128 | 2-0  | 1.56-0.00  | 0-0 | 0.00-0.00 |
|                       | May-21 | 145 | 18-0 | 13.89-0.00 | 0-0 | 0.00-0.00 |
|                       | Jun-21 | 132 | 3-0  | 2.58-0.00  | 0-0 | 0.00-0.00 |
|                       | Jul-21 | 137 | 8-0  | 6.56-0.00  | 0-0 | 0.00-0.00 |
|                       | Aug-21 | 133 | 4-0  | 2.82-0.00  | 0-0 | 0.00-0.00 |
|                       | Sep-21 | 131 | 3-0  | 2.14-0.00  | 0-0 | 0.00-0.00 |
|                       | Oct-21 | 129 | 3-0  | 2.05-0.00  | 0-0 | 0.00-0.00 |

**Table S4. Monthly number of new hospitalizations in Japan, January 2020-October 2021.**

| Bed Type                                                       | Month-Year | Observed | Excess  | % Excess    | Exiguous      | % Exiguous  |
|----------------------------------------------------------------|------------|----------|---------|-------------|---------------|-------------|
| General beds                                                   |            |          |         |             | 81683-170177  | 6.15-12.81  |
|                                                                | Jun-20     | 1158101  | 0-0     | 0.00-0.00   | 62283-139607  | 4.60-10.31  |
|                                                                | Jul-20     | 1215062  | 0-0     | 0.00-0.00   | 32076-117858  | 2.40-8.82   |
|                                                                | Aug-20     | 1218319  | 0-0     | 0.00-0.00   | 63611-147685  | 4.78-11.10  |
|                                                                | Sep-20     | 1182529  | 0-0     | 0.00-0.00   | 0-48566       | 0.00-3.71   |
|                                                                | Oct-20     | 1260436  | 0-0     | 0.00-0.00   | 42545-127614  | 3.23-9.68   |
|                                                                | Nov-20     | 1190471  | 0-0     | 0.00-0.00   | 56032-140342  | 4.26-10.66  |
|                                                                | Dec-20     | 1176219  | 0-0     | 0.00-0.00   | 74286-153585  | 5.71-11.80  |
|                                                                | Jan-21     | 1148090  | 0-0     | 0.00-0.00   | 182681-269879 | 13.90-20.53 |
|                                                                | Feb-21     | 1044546  | 0-0     | 0.00-0.00   | 0-38557       | 0.00-2.99   |
|                                                                | Mar-21     | 1250967  | 0-0     | 0.00-0.00   | 57117-138645  | 4.35-10.55  |
|                                                                | Apr-21     | 1175043  | 0-0     | 0.00-0.00   | 119906-207879 | 9.16-15.88  |
|                                                                | May-21     | 1101187  | 0-0     | 0.00-0.00   | 80683-166837  | 6.01-12.42  |
|                                                                | Jun-21     | 1176133  | 0-0     | 0.00-0.00   | 86158-168290  | 6.29-12.29  |
|                                                                | Jul-21     | 1201151  | 0-0     | 0.00-0.00   | 36559-127414  | 2.71-9.43   |
|                                                                | Aug-21     | 1223462  | 0-0     | 0.00-0.00   | 118498-205711 | 8.84-15.35  |
|                                                                | Sep-21     | 1134080  | 0-0     | 0.00-0.00   | 29395-111930  | 2.22-8.46   |
|                                                                | Oct-21     | 1211776  | 0-0     | 0.00-0.00   |               |             |
| Long-term care beds covered by long-term care insurance (LTCI) | Jun-20     | 783      | 0-0     | 0.00-0.00   | 637-945       | 36.87-54.68 |
|                                                                | Jul-20     | 795      | 0-0     | 0.00-0.00   | 590-899       | 34.83-53.07 |
|                                                                | Aug-20     | 733      | 0-0     | 0.00-0.00   | 591-898       | 36.24-55.05 |
|                                                                | Sep-20     | 730      | 0-0     | 0.00-0.00   | 581-878       | 36.12-54.61 |
|                                                                | Oct-20     | 749      | 0-0     | 0.00-0.00   | 524-812       | 33.57-52.02 |
|                                                                | Nov-20     | 642      | 0-0     | 0.00-0.00   | 636-923       | 40.63-58.99 |
|                                                                | Dec-20     | 682      | 0-0     | 0.00-0.00   | 561-833       | 37.03-54.98 |
|                                                                | Jan-21     | 597      | 0-0     | 0.00-0.00   | 621-891       | 41.74-59.87 |
|                                                                | Feb-21     | 602      | 0-0     | 0.00-0.00   | 597-868       | 40.62-59.04 |
|                                                                | Mar-21     | 682      | 0-0     | 0.00-0.00   | 539-786       | 36.72-53.54 |
|                                                                | Apr-21     | 607      | 0-0     | 0.00-0.00   | 566-801       | 40.19-56.90 |
|                                                                | May-21     | 540      | 0-0     | 0.00-0.00   | 575-799       | 42.94-59.68 |
|                                                                | Jun-21     | 563      | 0-0     | 0.00-0.00   | 518-726       | 40.20-56.31 |
|                                                                | Jul-21     | 515      | 0-0     | 0.00-0.00   | 553-749       | 43.75-59.26 |
|                                                                | Aug-21     | 525      | 0-0     | 0.00-0.00   | 494-690       | 40.67-56.78 |
|                                                                | Sep-21     | 512      | 0-0     | 0.00-0.00   | 492-665       | 41.81-56.49 |
|                                                                | Oct-21     | 378      | 0-0     | 0.00-0.00   | 588-758       | 51.77-66.72 |
| Tuberculosis care beds                                         |            |          |         |             |               |             |
|                                                                | Jun-20     | 856      | 158-74  | 22.62-10.60 | 0-0           | 0.00-0.00   |
|                                                                | Jul-20     | 1198     | 489-412 | 68.86-58.07 | 0-0           | 0.00-0.00   |
|                                                                | Aug-20     | 959      | 271-190 | 39.31-27.60 | 0-0           | 0.00-0.00   |



|                          |        |         |         |             |               |             |
|--------------------------|--------|---------|---------|-------------|---------------|-------------|
|                          | Sep-20 | 696     | 10-0    | 1.51-0.00   | 0-0           | 0.00-0.00   |
|                          | Oct-20 | 719     | 55-0    | 8.32-0.00   | 0-0           | 0.00-0.00   |
|                          | Nov-20 | 728     | 60-0    | 8.99-0.00   | 0-0           | 0.00-0.00   |
|                          | Dec-20 | 849     | 204-123 | 31.65-19.07 | 0-0           | 0.00-0.00   |
|                          | Jan-21 | 760     | 127-52  | 20.03-8.21  | 0-0           | 0.00-0.00   |
|                          | Feb-21 | 549     | 0-0     | 0.00-0.00   | 1-74          | 0.16-11.93  |
|                          | Mar-21 | 750     | 116-41  | 18.38-6.47  | 0-0           | 0.00-0.00   |
|                          | Apr-21 | 767     | 126-55  | 19.61-8.58  | 0-0           | 0.00-0.00   |
|                          | May-21 | 774     | 139-64  | 21.97-10.08 | 0-0           | 0.00-0.00   |
|                          | Jun-21 | 651     | 9-0     | 1.47-0.00   | 0-0           | 0.00-0.00   |
|                          | Jul-21 | 800     | 142-68  | 21.52-10.33 | 0-0           | 0.00-0.00   |
|                          | Aug-21 | 990     | 352-274 | 55.12-42.93 | 0-0           | 0.00-0.00   |
|                          | Sep-21 | 770     | 136-57  | 21.54-9.00  | 0-0           | 0.00-0.00   |
|                          | Oct-21 | 613     | 0-0     | 0.00-0.00   | 0-1           | 0.00-0.17   |
| Psychiatric<br>care beds |        |         |         |             |               |             |
|                          | Jun-20 | 32144   | 0-0     | 0.00-0.00   | 0-1319        | 0.00-3.94   |
|                          | Jul-20 | 32390   | 0-0     | 0.00-0.00   | 0-1173        | 0.00-3.50   |
|                          | Aug-20 | 30341   | 0-0     | 0.00-0.00   | 0-2382        | 0.00-7.28   |
|                          | Sep-20 | 30351   | 0-0     | 0.00-0.00   | 0-1857        | 0.00-5.77   |
|                          | Oct-20 | 32266   | 932-0   | 2.97-0.00   | 0-0           | 0.00-0.00   |
|                          | Nov-20 | 28421   | 0-0     | 0.00-0.00   | 724-3217      | 2.29-10.17  |
|                          | Dec-20 | 30362   | 0-0     | 0.00-0.00   | 0-644         | 0.00-2.08   |
|                          | Jan-21 | 26791   | 0-0     | 0.00-0.00   | 1989-3894     | 6.48-12.69  |
|                          | Feb-21 | 26582   | 0-0     | 0.00-0.00   | 1664-4112     | 5.42-13.40  |
|                          | Mar-21 | 32354   | 954-0   | 3.04-0.00   | 0-0           | 0.00-0.00   |
|                          | Apr-21 | 31299   | 0-0     | 0.00-0.00   | 0-1151        | 0.00-3.55   |
|                          | May-21 | 27405   | 0-0     | 0.00-0.00   | 2527-4966     | 7.81-15.34  |
|                          | Jun-21 | 31345   | 0-0     | 0.00-0.00   | 0-1898        | 0.00-5.71   |
|                          | Jul-21 | 31038   | 0-0     | 0.00-0.00   | 133-2146      | 0.40-6.47   |
|                          | Aug-21 | 29525   | 0-0     | 0.00-0.00   | 392-2889      | 1.21-8.91   |
|                          | Sep-21 | 29254   | 0-0     | 0.00-0.00   | 281-2591      | 0.88-8.14   |
|                          | Oct-21 | 30545   | 0-0     | 0.00-0.00   | 0-598         | 0.00-1.92   |
| Total                    |        |         |         |             |               |             |
|                          | Jun-20 | 1226593 | 0-0     | 0.00-0.00   | 83468-175615  | 5.95-12.52  |
|                          | Jul-20 | 1286794 | 0-0     | 0.00-0.00   | 62332-142381  | 4.36-9.96   |
|                          | Aug-20 | 1292224 | 0-0     | 0.00-0.00   | 27789-116920  | 1.97-8.30   |
|                          | Sep-20 | 1255682 | 0-0     | 0.00-0.00   | 59849-147242  | 4.27-10.50  |
|                          | Oct-20 | 1338960 | 0-0     | 0.00-0.00   | 0-41654       | 0.00-3.02   |
|                          | Nov-20 | 1268112 | 0-0     | 0.00-0.00   | 35215-123443  | 2.53-8.87   |
|                          | Dec-20 | 1267513 | 0-0     | 0.00-0.00   | 34334-121881  | 2.47-8.77   |
|                          | Jan-21 | 1236277 | 0-0     | 0.00-0.00   | 56035-137972  | 4.08-10.04  |
|                          | Feb-21 | 1118830 | 0-0     | 0.00-0.00   | 177416-267804 | 12.79-19.31 |
|                          | Mar-21 | 1336421 | 0-0     | 0.00-0.00   | 0-26201       | 0.00-1.92   |
|                          | Apr-21 | 1266674 | 0-0     | 0.00-0.00   | 36781-121305  | 2.65-8.74   |
|                          | May-21 | 1190820 | 0-0     | 0.00-0.00   | 100191-191439 | 7.25-13.85  |
|                          | Jun-21 | 1259108 | 0-0     | 0.00-0.00   | 68302-157973  | 4.82-11.15  |
|                          | Jul-21 | 1289926 | 0-0     | 0.00-0.00   | 68879-153906  | 4.77-10.66  |
|                          | Aug-21 | 1340790 | 0-0     | 0.00-0.00   | 0-82950       | 0.00-5.83   |

|                     |        |         |     |           |              |             |
|---------------------|--------|---------|-----|-----------|--------------|-------------|
|                     | Sep-21 | 1226876 | 0-0 | 0.00-0.00 | 94591-185212 | 6.70-13.12  |
|                     | Oct-21 | 1286355 | 0-0 | 0.00-0.00 | 23532-108962 | 1.69-7.81   |
| Long-term care beds |        |         |     |           |              |             |
|                     | Jun-20 | 34390   | 0-0 | 0.00-0.00 | 2105-5122    | 5.33-12.96  |
|                     | Jul-20 | 34774   | 0-0 | 0.00-0.00 | 2288-5189    | 5.73-12.99  |
|                     | Aug-20 | 34214   | 0-0 | 0.00-0.00 | 2138-5073    | 5.44-12.91  |
|                     | Sep-20 | 34875   | 0-0 | 0.00-0.00 | 1731-4707    | 4.37-11.89  |
|                     | Oct-20 | 37202   | 0-0 | 0.00-0.00 | 0-2202       | 0.00-5.59   |
|                     | Nov-20 | 34245   | 0-0 | 0.00-0.00 | 3803-6757    | 9.28-16.48  |
|                     | Dec-20 | 38609   | 0-0 | 0.00-0.00 | 0-2401       | 0.00-5.85   |
|                     | Jan-21 | 33895   | 0-0 | 0.00-0.00 | 4264-7216    | 10.37-17.55 |
|                     | Feb-21 | 33363   | 0-0 | 0.00-0.00 | 4468-7366    | 10.97-18.08 |
|                     | Mar-21 | 38780   | 0-0 | 0.00-0.00 | 0-2166       | 0.00-5.29   |
|                     | Apr-21 | 36527   | 0-0 | 0.00-0.00 | 1587-4500    | 3.87-10.97  |
|                     | May-21 | 31525   | 0-0 | 0.00-0.00 | 5628-8448    | 14.08-21.13 |
|                     | Jun-21 | 35823   | 0-0 | 0.00-0.00 | 1286-4146    | 3.22-10.37  |
|                     | Jul-21 | 34744   | 0-0 | 0.00-0.00 | 2736-5551    | 6.79-13.78  |
|                     | Aug-21 | 36198   | 0-0 | 0.00-0.00 | 538-3369     | 1.36-8.51   |
|                     | Sep-21 | 34860   | 0-0 | 0.00-0.00 | 1916-4748    | 4.84-11.99  |
|                     | Oct-21 | 36284   | 0-0 | 0.00-0.00 | 554-3375     | 1.40-8.51   |
